# Supplementary material for: Nuclear microsatellites reveal population genetic structuring and fine-scale pattern of hybridization in the Japanese mantis shrimp Oratosquilla oratoria
Source: PeerJ. 2020 Nov 5;8:e10270. doi: 10.7717/peerj.10270 (PMC7649012; doi:10.7717/peerj.10270)
Supplement: Table S1 [file peerj-08-10270-s004.xlsx]

## Sheet: Sheet1
Table S1 The sequence information of the ten microsatellite primers used in this study.
Loucs	Primer sequence (5´→3´)	Repeat motif	Ta (°C)	GenBank accession no.
c42018	F: CAGTTTGAGGCAGAGGGAGG	(GGA)6...(GGA)6	50-62	MG777546
	R: CTGCAGAAGCTGTGAATCGC
c16709	F: CACCATCTGGATCCCTGTAT	(CAA)5...(ATA)6	50-64	MG777547
	R: AAGTGTTTGTCACTGGCACG
c32844	F: TCCTCCTCCAGGCATTCTCA	(CCCTT)7	50-63	MG777548
	R: ACATTGCTGCACCAGTGTCT
c53123	F: ACAGACAGCCACGCAGG	(AG)6...(AG)7	50-64	MG777549
	R: CCATCTCGCATTTCCCGAT
c44131	F: CACAAGTCACTGACAAGAGAG	(GT)8...(TG)6	50-63	MG777550
	R: AGTGATCCAAGACCACGGTG
c41138	F: ATGACGACACCGACAAGGAC	(TC)10	50-58	MG777551
	R: CTCTTTGTCTTCTGGATCTTC
c43602	F: GACCCCACAATCGTAGCTCC	(CA)9aa(AT)8	50-64	MG777552
	R: CCAGAAGTCGGACATGGCTT
c45952	F: AACAGGCTTGCCACTCACTT	(AT)8...(TG)6	50-63	MG777553
	R: TCAACCTGTCCAGCAACCTC
c42119	F: GCACTGCTTCTGACTTGGGT	(AG)6...(AG)6	50-62	MG777555
	R: ACTTACCAGTTACTGACCCCC
c6684	F: TTCTGGAGCAAGCAAGGGAG	(TC)10	50-64	MG777568
	R: AGGAACAAAGAGGCATCCCC
Ta: annealing temperature
