# Supplementary material for: Nuclear microsatellites reveal population genetic structuring and fine-scale pattern of hybridization in the Japanese mantis shrimp Oratosquilla oratoria
Source: PeerJ. 2020 Nov 5;8:e10270. doi: 10.7717/peerj.10270 (PMC7649012; doi:10.7717/peerj.10270)
Supplement: Table S2 [file peerj-08-10270-s005.xlsx]

## Sheet: Sheet2
Table S2 Summary statistics for microsatellite DNA variability in O. oratoria populations.
Location	Abb.	Date of Collection	Sample size	Locus parameters	c42018	c16709	c32844	c53123	c44131	c41138	c43602	c45952	c42119	c6684	Average
Qinhuangdao	QHD	2014.05	24	Na	6	4	5	3	5	8	5	10	5	5	5.6
				AR	5.5	3.833	4.95	3	4.975	7.305	4.833	9.305	4.667	4.996	5.3364
				HO	0.791667	0.583333	0.625	0.291667	0.666667	0.708333	0.75	0.583333	0.666667	0.458333	0.6125
				HE	0.650709	0.534574	0.633865	0.626773	0.699468	0.671099	0.705674	0.794326	0.609929	0.731383	0.66578
				PIC	0.583759	0.472427	0.559938	0.531729	0.641571	0.599432	0.639917	0.754113	0.530732	0.668209	0.598183
Dalian	DL	2014.05	24	Na	8	3	4	3	4	7	5	10	5	5	5.4
				AR	7.614	2.667	4	2.833	4	6.475	4.833	9.493	4.642	4.809	5.1366
				HO	0.833333	0.0833333	0.583333	0.125	0.666667	0.625	0.791667	0.666667	0.291667	0.625	0.529167
				HE	0.742021	0.0824468	0.66578	0.531028	0.707447	0.630319	0.704787	0.836879	0.439716	0.628546	0.596897
				PIC	0.691663	0.0791343	0.5856	0.404749	0.64055	0.573634	0.642801	0.800346	0.390216	0.559287	0.536798
Dongying	DY	2014.11	23	Na	7	4	4	3	6	8	5	10	4	6	5.7
				AR	6.736	3.869	3.999	2.971	5.868	7.58	4.739	9.58	3.985	5.971	5.5298
				HO	0.73913	0.304348	0.73913	0.173913	0.73913	0.782609	0.565217	0.782609	0.391304	0.782609	0.6
				HE	0.68599	0.375845	0.648309	0.166184	0.742029	0.745894	0.707246	0.851208	0.509179	0.735266	0.616715
				PIC	0.638228	0.343164	0.567531	0.15626	0.685115	0.686423	0.629251	0.811888	0.454002	0.673973	0.564584
Qingdao	QD	2014.05	24	Na	8	3	5	3	6	6	4	12	3	5	5.5
				AR	7.45	2.975	4.975	2.833	5.667	5.805	4	11.276	3	4.784	5.2765
				HO	0.916667	0.291667	0.708333	0.0833333	0.75	0.916667	0.625	0.625	0.458333	0.666667	0.604167
				HE	0.741135	0.263298	0.718972	0.227837	0.755319	0.703901	0.711879	0.821809	0.435284	0.580674	0.596011
				PIC	0.68524	0.239408	0.653633	0.205801	0.695129	0.639098	0.647036	0.787221	0.380958	0.494915	0.542844
Otaru	OT	2015.06	24	Na	6	4	5	6	6	5	6	12	2	9	6.1
				AR	5.663	3.833	4.997	5.642	5.666	4.784	5.805	11.563	1.975	8.611	5.8539
				HO	0.666667	0.458333	0.625	0.5	0.375	0.666667	0.666667	0.625	0.0833333	0.166667	0.483333
				HE	0.692376	0.523936	0.743794	0.595745	0.661348	0.570035	0.746454	0.881206	0.0815603	0.782801	0.627926
				PIC	0.630962	0.4538	0.68306	0.544187	0.601021	0.488269	0.684237	0.849046	0.0766722	0.73889	0.575014
Aomori	AO	2015.1	24	Na	5	4	4	4	4	6	4	8	6	7	5.2
				AR	4.972	3.83	3.997	3.83	4	5.475	3.833	7.641	5.805	6.969	5.0352
				HO	0.875	0.583333	0.458333	0.125	0.708333	0.333333	0.666667	0.5	0.583333	0.25	0.508333
				HE	0.703014	0.58422	0.662234	0.579787	0.750887	0.58156	0.685284	0.766844	0.602837	0.762411	0.667908
				PIC	0.634211	0.481562	0.581512	0.478984	0.686402	0.496529	0.602186	0.72117	0.556551	0.71989	0.5959
Ishikawa	IS	2013.1	20	Na	6	4	4	3	4	7	5	7	8	6	5.4
				AR	6	4	4	3	4	7	5	7	8	6	5.4
				HO	0.55	0.4	0.05	0.6	0.8	0.5	0.65	0.55	0.45	0.1	0.465
				HE	0.494872	0.352564	0.644872	0.528205	0.737179	0.712821	0.702564	0.717949	0.85641	0.820513	0.656795
				PIC	0.455139	0.322818	0.571743	0.460387	0.670349	0.649214	0.639995	0.650739	0.815102	0.770025	0.600551
Aichi	AI	2015.1	22	Na	5	4	3	3	6	6	5	6	6	12	5.6
				AR	4.909	3.727	2.909	2.909	5.818	5.909	4.909	5.909	5.994	11.883	5.4876
				HO	0.772727	0.0909091	0.272727	0.227273	0.681818	0.227273	0.454545	0.318182	0.863636	0.454545	0.436364
				HE	0.67019	0.133192	0.512685	0.280127	0.745243	0.810782	0.667019	0.7537	0.810782	0.903805	0.628753
				PIC	0.612468	0.127473	0.396271	0.246712	0.682915	0.760462	0.599058	0.695213	0.762575	0.872525	0.575567
Setonaikai	SE	2015.1	24	Na	7	6	2	5	6	6	6	9	5	9	6.1
				AR	6.642	5.475	2	4.805	5.667	5.666	5.808	8.141	4.997	8.968	5.8169
				HO	0.75	0.333333	0.333333	0.5	0.833333	0.166667	0.625	0.625	0.666667	0.375	0.520833
				HE	0.75	0.336879	0.382979	0.516844	0.758865	0.654255	0.621454	0.704787	0.769504	0.871454	0.636702
				PIC	0.697417	0.316633	0.304688	0.461549	0.697833	0.590538	0.572365	0.639995	0.713539	0.837354	0.583191
Ariake Sea	AS	2015.02	24	Na	6	4	3	3	5	6	5	11	5	9	5.7
				AR	5.972	3.805	2.833	2.975	4.833	5.642	4.83	9.975	5	8.802	5.4667
				HO	0.708333	0.208333	0.291667	0.333333	0.583333	0.25	0.666667	0.416667	0.666667	0.541667	0.466667
				HE	0.703014	0.233156	0.318262	0.478723	0.664007	0.679078	0.687057	0.748227	0.804965	0.853723	0.617021
				PIC	0.655044	0.218976	0.274359	0.391294	0.604085	0.605277	0.617799	0.706692	0.754187	0.817558	0.564527
Dafeng	DF	2015.05	24	Na	6	5	4	3	6	7	8	11	6	7	6.3
				AR	5.969	4.5	3.997	2.997	5.667	6.475	7.45	10.462	5.975	6.996	6.0488
				HO	0.791667	0.166667	0.625	0.208333	0.75	0.458333	0.541667	0.541667	0.541667	0.416667	0.504167
				HE	0.755319	0.560284	0.653369	0.531028	0.781915	0.718085	0.710106	0.833333	0.786348	0.85195	0.718174
				PIC	0.697842	0.455495	0.575303	0.435131	0.72533	0.653607	0.657673	0.796518	0.734763	0.812576	0.654424
Shengshan	SS	2015.07	24	Na	7	6	2	6	6	8	5	9	4	7	6
				AR	6.944	5.639	2	5.78	5.808	7.924	4.663	8.33	3.95	6.993	5.8031
				HO	0.625	0.458333	0.333333	0.541667	0.708333	0.416667	0.375	0.583333	0.25	0.0833333	0.4375
				HE	0.707447	0.429078	0.421986	0.644504	0.749113	0.70656	0.445035	0.827128	0.414894	0.817376	0.616312
				PIC	0.66217	0.400443	0.32783	0.569839	0.690393	0.670735	0.400877	0.782682	0.370895	0.773544	0.564941
Nanji	NJ	2014.06	24	Na	6	4	2	4	4	7	6	8	6	11	5.8
				AR	5.809	3.784	2	3.83	4	6.639	5.5	7.9	5.833	10.585	5.588
				HO	0.958333	0.208333	0.375	0.458333	0.666667	0.25	0.625	0.416667	0.791667	0.416667	0.516667
				HE	0.780142	0.197695	0.43883	0.58422	0.674645	0.702128	0.610816	0.782801	0.744681	0.843085	0.635904
				PIC	0.725068	0.187298	0.337372	0.481562	0.611346	0.641346	0.54217	0.734028	0.687887	0.805975	0.575405
Beihai	BH	2015.07	24	Na	7	5	4	5	9	6	9	12	6	8	7.1
				AR	6.972	4.66	3.833	4.996	8.659	5.969	8.305	11.274	5.833	7.965	6.8466
				HO	0.75	0.333333	0.375	0.375	0.625	0.458333	0.458333	0.5	0.75	0.25	0.4875
				HE	0.826241	0.303191	0.575355	0.66844	0.839539	0.765957	0.72961	0.847518	0.808511	0.846631	0.721099
				PIC	0.782815	0.284774	0.508614	0.611679	0.800218	0.709932	0.672593	0.811205	0.759176	0.807639	0.674864
Na Allelic number, AR allelic richness, HO observed heterozygosity, HE expected heterozygosity, PIC polymorphism information content
