# Supplementary material for: Nuclear microsatellites reveal population genetic structuring and fine-scale pattern of hybridization in the Japanese mantis shrimp Oratosquilla oratoria
Source: PeerJ. 2020 Nov 5;8:e10270. doi: 10.7717/peerj.10270 (PMC7649012; doi:10.7717/peerj.10270)
Supplement: Table S3 — Only individuals with less than 50% posterior probability (q) of having pure ancestry from the assumed population are shown, which can be considered as migrants or hybrids descendants. [file peerj-08-10270-s006.xlsx]

## Sheet: Sheet1
Table S3 Ancestry inference for O. oratoria individuals in population AO, IS and SS inferred by STRUCTURE. Only individuals with less than 50% posterior probability (q) of having pure ancestry from the assumed population were shown, which can be considered as migrants or hybrids descendants.
			q for the other group
Individual	Prior pop	q prior pop	Present	Parent	Grandparent
AO_4	S&T-Group	0.146	0.128	0.477	0.249
AO_5	S&T-Group	0.164	0.137	0.429	0.27
AO_7	S&T-Group	0.004	0.912	0.069	0.015
AO_9	S&T-Group	0.015	0.919	0.042	0.025
AO_10	S&T-Group	0.207	0.076	0.119	0.597
AO_11	S&T-Group	0.005	0.974	0.012	0.009
AO_12	S&T-Group	0.061	0.818	0.063	0.057
AO_14	S&T-Group	0.29	0.032	0.451	0.227
AO_15	S&T-Group	0.256	0.036	0.397	0.311
AO_17	S&T-Group	0.388	0.071	0.333	0.207
AO_19	S&T-Group	0.1	0.358	0.391	0.152
AO_21	S&T-Group	0.082	0.386	0.412	0.12
AO_22	S&T-Group	0.202	0.035	0.512	0.251
AO_23	S&T-Group	0	0.999	0.001	0
IS_1	T-Group	0.074	0.767	0.114	0.045
IS_4	T-Group	0.07	0.353	0.245	0.332
IS_6	T-Group	0.386	0	0.204	0.41
IS_7	T-Group	0.25	0.041	0.277	0.433
IS_9	T-Group	0.132	0.738	0.045	0.086
IS_10	T-Group	0	0.989	0.009	0.002
IS_11	T-Group	0	0.988	0.01	0.002
IS_12	T-Group	0.008	0.735	0.195	0.063
IS_13	T-Group	0.311	0.054	0.222	0.412
IS_14	T-Group	0.002	0.899	0.08	0.019
IS_16	T-Group	0.001	0.964	0.028	0.007
IS_17	T-Group	0.002	0.984	0.008	0.006
IS_18	T-Group	0.215	0.237	0.09	0.458
IS_19	T-Group	0	0.985	0.011	0.004
SS_1	T-Group	0	1	0	0
SS_2	T-Group	0	0.99	0.009	0.001
SS_3	T-Group	0.005	0.921	0.049	0.025
SS_4	T-Group	0.054	0.218	0.467	0.261
SS_5	T-Group	0.004	0.897	0.062	0.037
SS_6	T-Group	0.132	0.733	0.05	0.085
SS_8	T-Group	0.142	0.638	0.048	0.172
SS_9	T-Group	0.236	0.345	0.223	0.196
SS_10	T-Group	0	0.998	0.002	0
SS_12	T-Group	0	0.972	0.022	0.005
SS_13	T-Group	0.121	0.647	0.026	0.205
SS_15	T-Group	0.001	0.899	0.079	0.02
SS_16	T-Group	0	0.999	0.001	0
SS_19	T-Group	0	0.988	0.011	0.001
SS_21	T-Group	0.015	0.795	0.089	0.101
SS_22	T-Group	0.002	0.848	0.129	0.022
SS_23	T-Group	0.01	0.941	0.031	0.018
SS_24	T-Group	0	0.987	0.012	0.001
